# Supplementary material for: DNA-Based Identification of Eurasian Vicia Species Using Chloroplast and Nuclear DNA Barcodes
Source: MDPI journal article supplement (doi:10.3390/plants11070947), 2022-03-31
Supplement: s1 [file s1]

**Table S1.** Multiple sequence alignment statistics.

| Barcoding region | <i>trnL</i> | ITS2 | <i>rpoC1</i> |
|------------------|-------------|------|--------------|
| Pi               | 130         | 37   | 25           |
| Co               | 180         | 203  | 405          |
| Va               | 207         | 200  | 37           |
| Si               | 77          | 162  | 12           |
| Total            | 492         | 436  | 442          |

Pi: Parsimony-informative sites, Co: Conserved sites,

Va: Variable sites, Si: Singleton sites.

**Table S2.** Primers used in this study.

| Region  | Primer                       | Reference                  |
|---------|------------------------------|----------------------------|
| trnL-F  | 5'-CGAAATCGGTAGACGCTACG-3'   | Taberlet et al., 2007      |
| trnL-R  | 5'-GGGGATAGAGGGACTTGAAC-3'   | Taberlet et al., 2007      |
| rpoC1-F | 5'-GGCAAAGAGGGAAGATTTTCG-3'  | Hollingsworth et al., 2009 |
| rpoC1-R | 5'-CCATAAGCATATCTTGAGTTGG-3' | Hollingsworth et al., 2009 |
| ITS2-F  | 5'-ATGCGATACTTGGTGTGAAT-3'   | Chen et al., 2010          |
| ITS2-R  | 5'-GACGCTTCTCCAGACTACAAT-3'  | Chen et al., 2010          |

**Table S3.** Best Maximum Likelihood model fit for the reconstruction of the *trnL*, ITS2, and *rpoC1* trees. Fitness assessment was performed for each alignment testing 24 nucleotide substitution models. The models with the lowest BIC score, which describe the substitution pattern the best, were selected for phylogenetic tree reconstructions.

| Barcoding region | Model | BIC      | AICc     | lnL      | Gamma    | R        |
|------------------|-------|----------|----------|----------|----------|----------|
| <i>trnL</i>      | T92+G | 3668.376 | 2317.342 | -978.518 | 0.693038 | 0.746764 |
| ITS2             | K2+G  | 2854.923 | 2359.526 | -1110.27 | 2.119952 | 1.279238 |
| <i>rpoC</i>      | JC+G  | 2415.15  | 1981.103 | -932.292 | 0.05     | 0.5      |

BIC: Bayesian Information Criterion, AICc: Akaike Information Criterion, lnL: Maximum Likelihood value, R: transition/transversion bias.
